# Supplementary material
Source: Springer Nature journal article supplement (https://www.springermedizin.de/resource/supplementary/13006_2011_130_MOESM2_ESM.pdf/9628054)

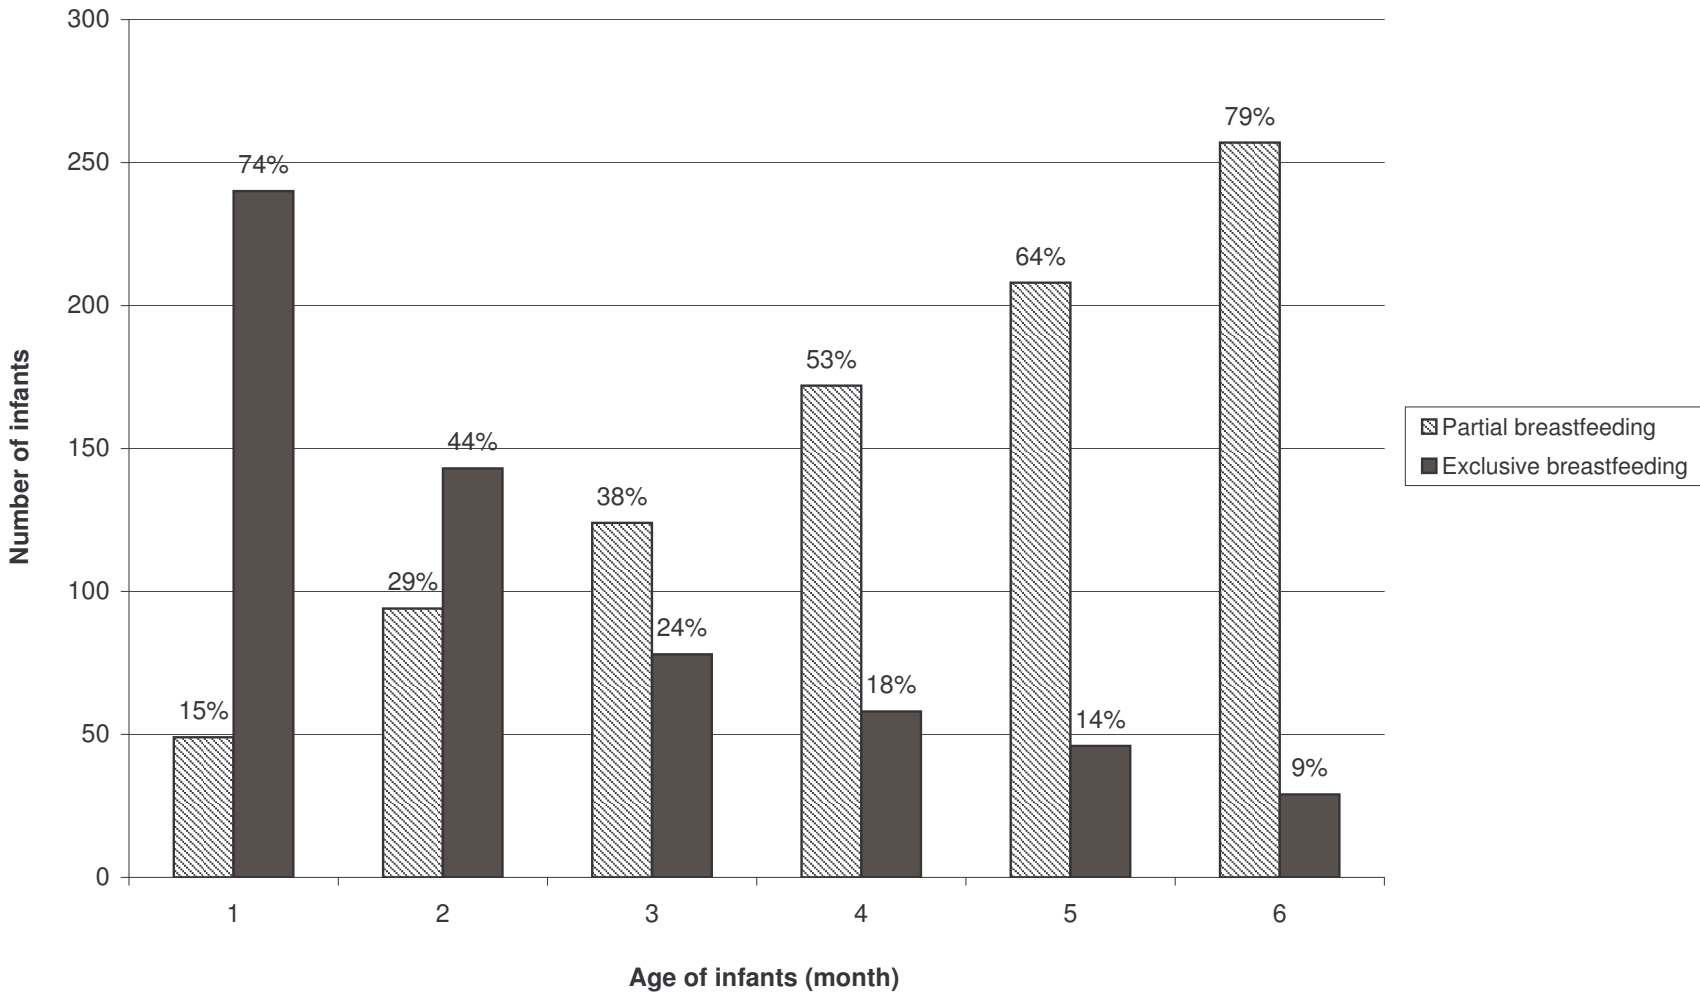

Supplement: MOESM2 [file 9628054]
